# Supplementary material for: High-precision apatiteδ37Cl measurement by SIMS with a 1012Ω amplifier Faraday cup
Source: Royal Society of Chemistry journal article supplement (doi:10.1039/d1ja00347j), 2021-12-06
Supplement: d1ja00347j1.xlsx [file d1ja00347j1.xlsx]

## Sheet: Session 1
Analysis na.	PI (nA)	35Cl		37Cl		37Cl/35Cl			δ37Cl raw	DTFA
		cps	SE (‰)	cps	SE (‰)	ratio	2SE (‰)			X	Y
Durango@01	2.09748	23146060	0.149517	7413411	0.140117	0.320256	0.0861391		-11.5568	-29	16
Durango@02	2.10006	23724290	0.208754	7597255	0.218628	0.320231	0.0924209		-11.6324	-23	12
Eppawala-AP@01	2.10092	151068800	0.205859	48374170	0.204204	0.32021	0.0468754		-11.6972	-27	13
Eppawala-AP@02	2.12306	147835400	0.141072	47335300	0.13204	0.320192	0.0884807		-11.754	-27	10
MGMH#128441A@01	2.08254	66586190	0.238047	21330170	0.242439	0.320341	0.0560123		-11.2926	24	11
MGMH#128441A@02	2.10053	67155850	0.275981	21511080	0.272452	0.320328	0.0749377		-11.3333	28	8
TUBAF#37@01	2.10155	15707580	0.297288	5029461	0.312227	0.320181	0.104591		-11.788	-31	9
TUBAF#37@02	2.14841	15790790	0.322932	5055909	0.361659	0.320228	0.141955		-11.6432	-33	12
Durango@03	2.09216	23445450	0.508876	7507857	0.534776	0.320292	0.0856064		-11.4457	-20	8
Durango@04	2.10569	22772890	0.489139	7292637	0.445748	0.320254	0.122822		-11.5605	-19	6
Eppawala-AP@03	2.10194	152831400	0.256468	48934890	0.252199	0.320185	0.0497036		-11.7744	-20	8
Eppawala-AP@04	2.11226	150034100	0.297732	48040660	0.290087	0.320204	0.0475956		-11.716	-27	6
MGMH#128441A@03	2.09724	68758560	0.27961	22025520	0.273651	0.320335	0.0499464		-11.3117	-24	9
MGMH#128441A@04	2.12635	68496820	0.426024	21942270	0.427726	0.320336	0.0525538		-11.309	-23	9
TUBAF#37@03	2.11453	17092450	0.297535	5474007	0.330216	0.320269	0.100261		-11.517	-29	8
TUBAF#37@04	2.12118	17051510	0.358189	5460333	0.32473	0.320256	0.171667		-11.5556	-29	8
Durango@05	2.12603	23412090	0.419869	7498640	0.420233	0.320289	0.100101		-11.4528	-20	7
Durango@06	2.13081	24990020	0.354068	8004038	0.340751	0.320296	0.0828812		-11.4336	-18	6
Eppawala-AP@05	2.13479	148981800	0.517758	47705100	0.508725	0.320207	0.0386771		-11.7074	-19	6
Eppawala-AP@06	2.11305	150822100	0.310365	48290500	0.289854	0.320208	0.0601914		-11.7046	-14	7
MGMH#128441A@05	2.13425	67713370	0.290436	21685350	0.22795	0.320334	0.0991478		-11.3151	-20	7
MGMH#128441A@06	2.11297	69051860	0.419376	22115600	0.453024	0.32036	0.0903316		-11.2343	-17	5
TUBAF#37@05	2.10076	18136250	0.571482	5807264	0.640526	0.320208	0.143701		-11.704	-22	8
TUBAF#37@06	2.09185	16663090	0.876984	5335679	0.891891	0.320209	0.124735		-11.6994	-22	8
Durango@07	2.13878	23432910	0.249399	7504915	0.244858	0.320288	0.116683		-11.4565	-14	4
Durango@08	2.12666	23399770	0.145435	7494729	0.165633	0.320283	0.0856673		-11.4725	-12	7
Eppawala-AP@07	2.10585	150438800	0.320236	48170090	0.314849	0.320198	0.0352909		-11.7358	-19	6
Eppawala-AP@08	2.10303	148721800	0.176214	47623720	0.21025	0.320191	0.036498		-11.7568	-14	7
MGMH#128441A@07	2.11281	66756840	0.388701	21383530	0.38531	0.320321	0.0506908		-11.3552	-16	6
MGMH#128441A@08	2.11712	68706070	0.246461	22008980	0.240847	0.320331	0.0513588		-11.3253	-15	8
TUBAF#37@07	2.13526	15603600	0.175445	4996766	0.177982	0.320233	0.104955		-11.6253	-17	8
TUBAF#37@08	2.12118	16501330	0.284297	5284112	0.322193	0.320183	0.147291		-11.7802	-12	5
Durango@9	2.1168	23957300	0.291019	7672772	0.297251	0.320269	0.103848		-11.5167	-6	7
Durango@10	2.13526	23921700	0.188669	7660933	0.195318	0.32024	0.0979941		-11.6043	4	5
Eppawala-AP@09	2.12181	151759600	0.378638	48594780	0.397471	0.320212	0.0665955		-11.6904	-15	9
Eppawala-AP@10	2.13034	150904900	0.281869	48321050	0.283045	0.320209	0.0712056		-11.7019	-18	5
MGMH#128441A@09	2.10155	67925920	0.354222	21756790	0.338443	0.32031	0.0758765		-11.3904	-9	8
MGMH#128441A@10	2.12705	69187770	0.430239	22163010	0.418499	0.32033	0.0571522		-11.3262	-10	8
TUBAF#37@09	2.12846	15642200	0.275975	5009312	0.266244	0.320247	0.104811		-11.5836	-23	9
TUBAF#37@10	2.12822	18631720	0.187596	5965989	0.204263	0.320199	0.141712		-11.7327	-14	5
Durango@11	2.12173	23845870	0.257908	7637922	0.212658	0.320265	0.116189		-11.5293	7	5
Durango@12	2.09967	24174280	0.278255	7742536	0.276502	0.320277	0.093639		-11.491	10	8
Eppawala-AP@11	2.09458	155936500	0.0842814	49930850	0.083069	0.320193	0.0432567		-11.7497	-11	7
Eppawala-AP@12	2.09153	150391800	0.156143	48162600	0.14903	0.320187	0.0462023		-11.7688	2	6
MGMH#128441A@11	2.09748	66692010	0.444168	21367850	0.473475	0.320325	0.115255		-11.342	-10	8
MGMH#128441A@12	2.08645	66700050	0.358166	21364550	0.350732	0.320312	0.0507131		-11.3833	-6	9
TUBAF#37@11	2.11899	18775770	0.270377	6011949	0.249309	0.320237	0.106996		-11.6133	-16	7
TUBAF#37@12	2.12611	17014640	0.452622	5448212	0.489795	0.320215	0.138676		-11.6809	-9	7
Durango@13	2.09005	23848760	0.389338	7638685	0.361532	0.320247	0.112749		-11.5846	10	6
Durango@14	2.09404	23365290	0.507619	7483780	0.505673	0.320295	0.0857262		-11.4358	13	6
Eppawala-AP@13	2.10937	153181100	0.203188	49048410	0.196404	0.320203	0.0503214		-11.7185	1	8
Eppawala-AP@14	2.0647	150628400	0.355807	48228690	0.352505	0.320187	0.0492369		-11.7691	10	3
MGMH#128441A@13	2.11015	67362020	0.326577	21577000	0.322694	0.320319	0.0673106		-11.362	-6	7
MGMH#128441A@14	2.0805	65563160	0.312029	21000950	0.302943	0.32032	0.0594236		-11.3593	0	6
TUBAF#37@13	2.07769	15626620	0.850398	5003770	0.865627	0.320198	0.115835		-11.733	-9	6
TUBAF#37@14	2.08277	16769270	0.228937	5370543	0.246516	0.320235	0.104874		-11.6201	-8	2
Durango@15	2.07526	22664070	0.180995	7259408	0.190973	0.320299	0.0870275		-11.4222	12	7
Durango@16	2.09083	22927100	0.412435	7343725	0.364088	0.320265	0.113973		-11.5278	9	5
Eppawala-AP@15	2.08308	148887700	0.521136	47672210	0.51567	0.320197	0.0558194		-11.7389	9	5
Eppawala-AP@16	2.08042	152238400	0.30386	48743610	0.303584	0.320187	0.0441448		-11.7698	13	4
MGMH#128441A@15	2.11164	67932990	0.563905	21761980	0.551068	0.320345	0.0577134		-11.2812	-3	7
MGMH#128441A@16	2.07925	68090560	0.347857	21810440	0.353822	0.320315	0.0581066		-11.3731	-2	5
TUBAF#37@15	2.08848	17199790	0.371336	5507648	0.37962	0.320216	0.119663		-11.679	-9	8
TUBAF#37@16	2.10851	16534970	0.427992	5297595	0.369681	0.320271	0.127235		-11.5099	-9	8
Durango@17	2.06658	23646020	0.498994	7573727	0.506188	0.320308	0.0851828		-11.3948	12	7
Durango@18	2.09341	24336980	0.263837	7795397	0.284081	0.320262	0.105185		-11.5364	6	5
Eppawala-AP@17	2.08692	151782100	0.249402	48597960	0.243497	0.32018	0.0595419		-11.7898	13	5
Eppawala-AP@18	2.07088	148985500	0.345125	47702550	0.340501	0.32018	0.0339323		-11.7895	16	3
MGMH#128441A@17	2.09138	69082610	0.467871	22129390	0.473251	0.320342	0.0859143		-11.2898	-1	8
MGMH#128441A@18	2.04233	67512350	0.425271	21626140	0.408964	0.320344	0.0776682		-11.2824	-2	5
TUBAF#37@17	2.055	16495820	0.548777	5281594	0.536825	0.320179	0.118381		-11.7944	1	8
TUBAF#37@18	2.08082	17067160	0.577327	5465925	0.57506	0.32026	0.114074		-11.5438	0	5
Durango@19	2.13433	24086920	0.403687	7715320	0.403009	0.320312	0.095611		-11.384	-2	8
Durango@20	2.10296	24190670	0.415879	7747215	0.413404	0.320267	0.0969204		-11.5222	-4	7
Eppawala-AP@19	2.08739	147790100	0.595746	47320820	0.588307	0.320193	0.0416672		-11.7488	12	7
Eppawala-AP@20	2.09944	152869800	0.156865	48948960	0.151564	0.320195	0.047445		-11.7451	16	6
MGMH#128441A@19	2.08183	68178280	0.256545	21837280	0.235117	0.320342	0.0703287		-11.2895	2	7
MGMH#128441A@20	2.07816	67257390	0.0995514	21546330	0.109796	0.320354	0.0515396		-11.2534	6	7
TUBAF#37@19	2.07964	16933000	0.400362	5421802	0.416247	0.320191	0.159205		-11.7549	2	6
TUBAF#37@20	2.04154	16425130	0.35391	5259611	0.33695	0.320227	0.134099		-11.6435	4	5
Durango@21	2.06994	23132730	0.34435	7409181	0.331858	0.320294	0.0863052		-11.4373	-12	5
TUBAF#37@21	2.10358	16612400	0.657205	5319192	0.661983	0.320187	0.123027		-11.7694	4	4

## Sheet: Session 2
Analysis na.	PI (nA)	35Cl		37Cl		37Cl/35Cl			δ37Cl raw	DTFA
		cps	SE (‰)	cps	SE (‰)	ratio	2SE (‰)			X	Y
MGMH#128441A one fragment@01	2.03325	65064390	0.1626	20853310	0.155832	0.320498	0.055571		-10.808	36	-58
MGMH#128441A one fragment@02	2.03364	64983380	0.118451	20824960	0.128548	0.320483	0.0588327		-10.8546	36	-57
MGMH#128441A one fragment@03	2.02793	64953540	0.246428	20818620	0.256372	0.320511	0.0568597		-10.7679	35	-58
MGMH#128441A one fragment@04	2.03591	65670310	0.184801	21049520	0.191971	0.320503	0.0514418		-10.7929	34	-58
MGMH#128441A one fragment@05	2.04053	65414370	0.219907	20965920	0.221304	0.320504	0.0633936		-10.7914	34	-58
MGMH#128441A one fragment@06	2.03466	65400110	0.167357	20963490	0.156675	0.320517	0.0643508		-10.7494	35	-58
MGMH#128441A one fragment@07	2.0291	65330120	0.156071	20938360	0.154306	0.320506	0.0515783		-10.783	37	-59
MGMH#128441A one fragment@08	2.01518	65089070	0.391611	20862450	0.392595	0.320522	0.0516725		-10.7358	37	-57
MGMH#128441A one fragment@09	2.02371	64918930	0.10713	20807530	0.111107	0.320526	0.051742		-10.7228	35	-57
MGMH#128441A one fragment@10	2.04092	65798540	0.149836	21089550	0.156791	0.320514	0.0513931		-10.7608	34	-58
MGMH#128441A fragments@01	2.00642	64912750	0.233593	20804520	0.234788	0.320504	0.0517441		-10.7914	45	-58
MGMH#128441A fragments@02	2.0133	64607380	0.198693	20706370	0.20092	0.320495	0.0518667		-10.8164	43	-58
MGMH#128441A fragments@03	2.0158	64665760	0.263173	20725780	0.259493	0.32051	0.0518463		-10.7701	42	-58
MGMH#128441A fragments@04	2.00501	64246930	0.186956	20590350	0.187571	0.320493	0.052016		-10.8241	42	-58
MGMH#128441A fragments@05	1.99351	64195980	0.339814	20574240	0.341987	0.320497	0.063153		-10.8117	42	-58
MGMH#128441A fragments@06	2.00696	65672340	0.233341	21047890	0.224416	0.320503	0.0566377		-10.7923	39	-58
MGMH#128441A fragments@07	1.99617	64342980	0.290683	20618810	0.273905	0.320491	0.0692081		-10.829	40	-58
MGMH#128441A fragments@08	2.00266	64701650	0.27966	20736260	0.275118	0.320495	0.0518291		-10.8173	36	-57
MGMH#128441A fragments@09	2.018	65424800	0.231153	20969710	0.226111	0.320516	0.0565999		-10.7522	33	-58
MGMH#128441A fragments@10	2.01494	64731230	0.17425	20745400	0.176	0.32051	0.0614387		-10.7725	30	-58
MGMH#128441A fragments@11	2.03036	64244390	0.171909	20590630	0.166939	0.3205	0.0520149		-10.8028	27	-57
MGMH#128441A fragments@12	2.01612	65475420	0.26	20984420	0.272097	0.3205	0.0704496		-10.8025	30	-57
MGMH#128441A fragments@13	2.02457	66106340	0.378972	21187150	0.366779	0.320501	0.0667536		-10.7991	26	-57
MGMH#128441A fragments@14	2.0205	65598110	0.253652	21023380	0.295819	0.320491	0.0731569		-10.8309	26	-57
MGMH#128441A fragments@15	2.02496	63996360	0.345536	20512590	0.341557	0.320533	0.0536881		-10.7009	25	-56
TUBAF#37 one fragment@01	2.03615	16286950	0.39119	5217332	0.38652	0.320338	0.133062		-11.3019	31	-58
TUBAF#37 one fragment@02	2.04788	15907820	0.199738	5096848	0.200148	0.320412	0.107248		-11.0753	31	-58
TUBAF#37 one fragment@03	2.04076	16067910	0.0993266	5147656	0.101865	0.320368	0.139539		-11.2108	30	-58
TUBAF#37 one fragment@04	2.00571	16385040	0.0530806	5249427	0.055198	0.320375	0.1469		-11.1892	32	-58
TUBAF#37 one fragment@05	2.02441	16264640	0.167323	5211057	0.170414	0.320392	0.161173		-11.1364	31	-58
TUBAF#37 one fragment@06	2.01784	16289870	0.115314	5219476	0.117503	0.320393	0.127098		-11.1312	32	-57
TUBAF#37 one fragment@07	1.98068	15825870	0.0616261	5070411	0.0968715	0.320413	0.149847		-11.0707	35	-57
TUBAF#37 one fragment@08	1.98013	15382320	0.145537	4927470	0.126043	0.320323	0.126805		-11.3494	34	-58
TUBAF#37 one fragment@09	1.98334	16070260	0.209217	5148450	0.216295	0.320331	0.108945		-11.3231	35	-58
TUBAF#37 one fragment@10	1.98717	16615090	0.162315	5323051	0.172715	0.320349	0.155842		-11.2698	32	-57
TUBAF#37 fragments@01	1.98749	16556150	0.133246	5304046	0.137554	0.320331	0.122393		-11.3225	41	-58
TUBAF#37 fragments@02	1.97927	17925210	0.135423	5741272	0.136885	0.32035	0.154523		-11.2657	39	-57
TUBAF#37 fragments@03	1.99257	15141120	0.167101	4851366	0.165966	0.320429	0.151363		-11.0219	37	-58
TUBAF#37 fragments@04	1.99257	15821880	0.157818	5068226	0.160789	0.320332	0.13639		-11.3219	36	-58
TUBAF#37 fragments@05	1.99179	16204900	0.221414	5191242	0.228385	0.32035	0.146691		-11.2651	38	-58
TUBAF#37 fragments@06	1.97802	16458220	0.152825	5271693	0.179711	0.32033	0.123391		-11.3272	35	-58
TUBAF#37 fragments@07	1.99195	15972980	0.202515	5116946	0.200454	0.320366	0.104541		-11.2151	34	-58
TUBAF#37 fragments@08	1.94892	15903240	0.171019	5094686	0.178777	0.320346	0.104776		-11.2787	36	-58
TUBAF#37 fragments@09	1.97473	16375720	0.134654	5246083	0.132684	0.320342	0.103245		-11.2886	29	-57
TUBAF#37 fragments@10	2.00008	16668630	0.227956	5339881	0.239947	0.320364	0.123583		-11.2213	28	-57
TUBAF#37 fragments@11	1.9986	16334670	0.111483	5232439	0.139212	0.320287	0.120548		-11.4602	29	-57
TUBAF#37 fragments@12	2.01393	16347150	0.134701	5236845	0.149901	0.320352	0.103336		-11.259	26	-57
TUBAF#37 fragments@13	1.98811	16566120	0.200278	5306782	0.183181	0.320339	0.102649		-11.2997	28	-57
TUBAF#37 fragments@14	1.99413	17278630	0.187125	5534786	0.169578	0.32031	0.148583		-11.3895	25	-57
TUBAF#37 fragments@15	2.01056	16717400	0.0737686	5355103	0.0923493	0.32031	0.102184		-11.3889	22	-56
Eppawala-AP one fragment@01	2.00415	144074300	0.304627	46162360	0.303998	0.320407	0.0347233		-11.0889	30	-57
Eppawala-AP one fragment@02	2.01236	144492200	0.248105	46296600	0.2494	0.320412	0.034673		-11.0756	30	-57
Eppawala-AP one fragment@03	2.0144	144930200	0.152638	46434020	0.151519	0.320386	0.0346213		-11.1549	29	-57
Eppawala-AP one fragment@04	2.01315	144373300	0.161252	46257400	0.15949	0.320401	0.0395593		-11.1068	28	-57
Eppawala-AP one fragment@05	2.02425	144872700	0.316875	46417140	0.315378	0.320397	0.0378146		-11.1216	27	-57
Eppawala-AP one fragment@06	2.03669	145009800	0.240504	46466780	0.255495	0.320407	0.0369829		-11.0904	26	-57
Eppawala-AP one fragment@07	2.02136	145156000	0.200483	46509060	0.202251	0.320405	0.046234		-11.0963	26	-57
Eppawala-AP one fragment@08	2.01862	146337900	0.144162	46887840	0.141842	0.320405	0.0450967		-11.0966	27	-57
Eppawala-AP one fragment@09	2.0065	148377400	0.169435	47540860	0.166211	0.320401	0.0342159		-11.1071	26	-57
Eppawala-AP one fragment@10	2.00939	145885500	0.19119	46741150	0.197105	0.320396	0.0352084		-11.1231	27	-57
Eppawala-AP fragments@01	1.99187	144531600	0.359877	46306310	0.363457	0.320383	0.0346691		-11.1633	39	-57
Eppawala-AP fragments@02	2.00955	144319000	0.198515	46237950	0.186846	0.320383	0.0492976		-11.1636	38	-57
Eppawala-AP fragments@03	2.00321	144392700	0.248145	46254470	0.27447	0.320383	0.0574717		-11.1636	36	-57
Eppawala-AP fragments@04	2.02261	144295900	0.391327	46231430	0.399753	0.320394	0.0346802		-11.1299	34	-58
Eppawala-AP fragments@05	1.95604	142702200	0.163077	45719510	0.157847	0.320387	0.0348909		-11.1512	37	-57
Eppawala-AP fragments@06	1.94806	144183500	0.206514	46194050	0.209584	0.320381	0.0350464		-11.1701	36	-57
Eppawala-AP fragments@07	1.95213	143278700	0.182356	45906110	0.180039	0.320393	0.0372006		-11.1343	32	-57
Eppawala-AP fragments@08	1.99046	144214100	0.149791	46202980	0.139659	0.320401	0.0347068		-11.1077	30	-57
Eppawala-AP fragments@09	2.00313	144372100	0.201528	46256120	0.202114	0.320395	0.0474953		-11.1262	27	-57
Eppawala-AP fragments@10	2.00133	144497100	0.206783	46300920	0.191057	0.320398	0.037335		-11.1188	26	-57
Eppawala-AP fragments@11	1.97825	145680900	0.380878	46675740	0.383795	0.3204	0.0345316		-11.1099	28	-57
Eppawala-AP fragments@12	1.9831	144726700	0.163351	46371140	0.161622	0.320405	0.034645		-11.0944	25	-56
Eppawala-AP fragments@13	1.99015	141947500	0.194514	45482870	0.191023	0.320423	0.0390206		-11.0389	23	-57
Eppawala-AP fragments@14	2.00704	144022000	0.216324	46145010	0.210097	0.320403	0.046657		-11.1012	21	-56
Eppawala-AP fragments@15	2.00892	145663800	0.133836	46672400	0.131073	0.320412	0.0371183		-11.0747	23	-56
Durango one fragment@01	2.00282	24353360	13.1963	7802796	13.2507	0.320411	0.148744		-11.0762	23	-56
Durango one fragment@02	2.00767	22320330	0.166424	7151100	0.151821	0.320414	0.0883653		-11.0688	24	-55
Durango one fragment@03	1.96746	22238570	1.34989	7124743	1.3682	0.320378	0.163878		-11.1802	24	-57
Durango one fragment@04	1.95995	22135660	0.162299	7092113	0.170724	0.320404	0.109378		-11.1	22	-56
Durango one fragment@05	1.97747	21898520	0.278013	7016885	0.274508	0.320435	0.0892208		-11.0019	21	-56
Durango one fragment@06	1.96699	21855330	0.367725	7003338	0.367507	0.320441	0.0998108		-10.9855	21	-55
Durango one fragment@07	1.98498	22089390	0.234186	7077348	0.219886	0.320395	0.110174		-11.1278	21	-56
Durango one fragment@08	1.99155	22218760	0.150909	7120028	0.136979	0.320451	0.10315		-10.9531	21	-56
Durango one fragment@09	1.995	22347860	0.182426	7161118	0.210287	0.320431	0.111746		-11.017	22	-56
Durango one fragment@10	1.96456	22309010	0.13614	7148255	0.129786	0.320431	0.119261		-11.017	24	-56
Durango fragments@01	1.97559	22991730	0.175211	7367176	0.174182	0.320436	0.11737		-10.9994	31	-56
Durango fragments@02	1.9921	22318250	0.176251	7150526	0.16715	0.320415	0.123542		-11.0648	28	-56
Durango fragments@03	1.98545	22818880	0.13243	7312001	0.149856	0.320429	0.0873878		-11.0201	28	-57
Durango fragments@04	1.99187	22854940	0.126855	7323137	0.154645	0.32043	0.105375		-11.0188	27	-57
Durango fragments@05	1.9655	22815000	0.255989	7310757	0.247409	0.320445	0.102887		-10.9728	29	-56
Durango fragments@06	1.97935	22947460	0.169789	7353174	0.189291	0.320441	0.0871419		-10.983	26	-56
Durango fragments@07	1.9558	22775310	0.296112	7297984	0.300066	0.320423	0.111916		-11.0398	27	-56
Durango fragments@08	1.95486	22531940	0.202597	7219634	0.17724	0.320447	0.0879434		-10.9654	26	-56
Durango fragments@09	1.95111	22916750	0.0976584	7342936	0.106259	0.320428	0.108077		-11.0238	27	-55
Durango fragments@10	1.96081	22605320	0.183238	7244256	0.194906	0.320443	0.0882598		-10.9793	21	-55
Durango fragments@11	1.96104	22882270	0.0874346	7332473	0.08519	0.320452	0.106312		-10.9491	19	-55
Durango fragments@12	1.96965	23069820	0.136876	7392136	0.149707	0.320431	0.0869139		-11.0157	18	-55
Durango fragments@13	1.96316	22466120	0.207951	7198486	0.192607	0.320415	0.150814		-11.0642	16	-54
Durango fragments@14	1.96754	22422320	0.127483	7184895	0.138036	0.320452	0.0881571		-10.9515	17	-54
Durango fragments@15	1.96417	22608140	0.329683	7244417	0.354416	0.320434	0.129169		-11.0062	16	-54
